# Supplementary material for: Suppression of p16 alleviates the senescence-associated secretory phenotype
Source: Aging (Albany NY). 2021 Feb 6;13(3):3290–312. doi: 10.18632/aging.202640 (PMC7906185; doi:10.18632/aging.202640)
Supplement: Supplementary Table 1 [file aging-13-202640-s002.xls]

## Sheet: Sheet1
Supplementary Table 1. 232 total unique SASP genes including soluble factors and exosomes obtained from [54].
SASP_list
KRT5
IGFBP6
HBA1
SERPINB2
ACTC1
CCL13
VASN
COL6A2
CD248
HBB
NNMT
CSF3
EFEMP2
KRT7
IGFBP7
MFGE8
MXRA8
COL1A1
ETV5
ITPKA
SERPINE1
MYL9
SOX17
TGFB1
PRSS22
CDK20
PCOLCE
FBLN1
EHD2
PTGES
NXN
SEMA7A
CST3
HSPG2
CLEC11A
AEBP1
AXL
COL6A1
S100A13
CD14
MAPK11
EMILIN1
BGN
TUBB6
LOXL2
SLC25A6
ITGA3
CD55
MMP14
CEBPB
LAMB3
CSPG4
PLAU
DBN1
TIMP2
RCN3
PLOD3
C1R
LAMB2
LTBP2
PXDN
MRC2
SPARC
SLC25A5
SERPINF1
VAT1
TNFRSF1A
FGFR1
VIM
PSMA7
AGRN
GAPDH
CD276
SERPINH1
RAB11B
TIMP1
CD9
CTSB
RPL10
HSPA1A
PLOD1
PLAUR
SLC1A5
GEM
PLXNB2
FBLN5
TUBA1B
CD151
RPS16
ACTG1
SUMO3
DBNL
ACTN4
ACTN1
RAB5C
TBCB
CD63
SDF4
LAMA1
GNA12
LASP1
P4HB
PSMC5
HLA-B
HLA-C
SQSTM1
SLC3A2
RPL35
RPL18A
RPL13
RBP4
APOE
FASN
LRFN4
ENO3
RPL36
RPL18
RPL27A
RPS20
CDC37
RPS11
RPL23
RPS9
ALB
ITIH2
CXCL13
BLK
KIF1A
ACAP1
UCHL1
NGFR
FGFR4
VTN
LCK
CSF2
CCL4
MIF
CSTB
S100A9
VEGFC
GM2A
BASP1
HCK
TKT
FGR
PDLIM1
S100A10
OAS3
CTTN
LGALS3BP
SERPINF2
OS9
ALDOA
PSME2
RRP7A
MYH9
DCTN2
PGD
GALNT2
ICAM1
NUDC
GPI
ENO1
VASP
LMNA
RRBP1
FDPS
PEA15
NEU1
PSMB2
CLIC1
AKR1B1
PSME1
HDGF
TUBB
ATF5
ARHGEF18
MAP4
PFDN2
PTBP1
EIF6
MDH2
PFN1
UBA1
CALR
PSMB4
EIF3I
CHMP4B
MYL12A
WDR1
COG1
TPM3
SRRT
PLEC
FSCN1
ARPC1A
LTF
KRT6A
KRT16
SFN
ISG15
HAMP
ECM1
ICAM3
GRN
PFKP
G6PD
SH3BGRL3
HSPB1
ACOT7
A1BG
ATP6AP1
CTSZ
TWF2
B4GALT1
PSAP
TUBB2A
ANXA6
GNAI2
FLNA
ANXA11
ACTR1A
GNB2
PSMB7
CHMP1A
SH3GL1
AP2A1
GNB1
TTYH3
HLA-A
ACTB
TNIP2
