# Supplementary material for: Suppression of p16 alleviates the senescence-associated secretory phenotype
Source: Aging (Albany NY). 2021 Feb 6;13(3):3290–312. doi: 10.18632/aging.202640 (PMC7906185; doi:10.18632/aging.202640)
Supplement: Supplementary Table 2 [file aging-13-202640-s003.xls]

## Sheet: Sheet1
Supplementary Table 2. Differential expression analysis of 232-SASP factors (Basisty et al., 2020) in CDKN2A-low (p16-low) vs. CDKN2A-high (p16-high) tumors obtained from TCGA.
PAAD					SKCM					COADREAD					MESO					BCLA					GBM
Gene	Log2(FC)	pvalue	padj		Gene	Log2(FC)	pvalue	padj		Gene	Log2(FC)	pvalue	padj		Gene	Log2(FC)	pvalue	padj		Gene	Log2(FC)	pvalue	padj		Gene	Log2(FC)	pvalue	padj
RBP4	-1.13846	0.000528768	0.0242795		BLK	-3.31693	1.57215e-07	5.89882e-05		KRT6A	-2.5776	1.4863e-20	8.59592e-18		ISG15	-3.23878	4.21311e-11	7.0018e-08		CSF3	-2.87906	9.90388e-14	7.74773e-12		BLK	-2.33849	4.20015e-05	0.00215838
PLEC	-0.711639	4.86459e-05	0.00751401		LTF	-3.00706	6.27331e-06	0.000775076		KRT16	-2.0742	3.93191e-15	4.37306e-13		ALB	-2.81617	0.000156288	0.00406346		CSF2	-2.58672	2.59165e-15	2.86559e-13		OS9	-2.16467	1.722e-15	2.18867e-12
LRFN4	-0.623375	0.00187457	0.0457239		KIF1A	-2.52322	0.000652491	0.0132335		HBA1	-1.95756	7.59758e-13	4.13537e-11		S100A9	-1.85882	3.5282e-06	0.000290721		LTF	-2.03089	6.06039e-08	8.77448e-07		DCTN2	-1.71722	8.3493e-11	5.14483e-08
FASN	-0.573279	0.00104719	0.0339323		RBP4	-2.36011	0.000544217	0.0120313		KRT5	-1.94354	4.37415e-14	3.43184e-12		RCN3	-1.65153	0.000206029	0.00491057		CCL13	-1.83675	1.63046e-09	3.90206e-08		HBB	-1.55658	4.92726e-06	0.00045601
HLA-B	-0.480156	0.000768813	0.0291158		UCHL1	-1.91417	0.00268093	0.0324923		SERPINB2	-1.62758	1.80643e-07	1.91544e-06		HLA-B	-1.59399	9.49373e-07	0.000125764		ALB	-1.71287	0.000675785	0.00264383		CCL4	-1.28148	0.000316278	0.00830785
RPL13	-0.47937	0.000194457	0.0154388		TTYH3	-1.74737	6.42178e-07	0.000167618		ALB	-1.46376	0.000423793	0.00152967		HBB	-1.54586	0.00741173	0.0464971		NGFR	-1.67122	1.8112e-08	3.07966e-07		ACTC1	-1.27434	0.000231751	0.0068283
RPL36	-0.477533	0.00019822	0.0156471		LCK	-1.6788	0.00021774	0.00677287		KIF1A	-1.39239	4.72301e-08	6.11274e-07		CD14	-1.51278	1.37999e-06	0.000158665		CCL4	-1.54781	6.26678e-11	2.26336e-09		FBLN1	-1.2705	0.000114919	0.00422183
HLA-C	-0.438997	0.000182497	0.0150799		ACAP1	-1.61035	0.000173746	0.00594897		ACTC1	-1.29887	7.30291e-09	1.25845e-07		HLA-A	-1.41882	1.0275e-06	0.00013417		KIF1A	-1.46084	0.00146153	0.00516087		RBP4	-1.25513	0.000238674	0.00693648
RPL35	-0.438505	0.000106997	0.0115882		RCN3	-1.60721	0.000751322	0.0144411		TUBB2A	-1.21932	5.74794e-19	1.87661e-16		HLA-C	-1.418	1.31626e-05	0.000761394		MXRA8	-1.45121	6.60449e-11	2.36804e-09		HBA1	-1.23413	0.000281926	0.0077337
RPL18	-0.400874	0.00191664	0.0459646		MIF	-1.26525	3.01782e-05	0.00190038		RPL18A	-1.21394	1.70077e-16	2.75416e-14		CST3	-1.38661	5.43321e-09	3.00983e-06		NNMT	-1.45049	6.40455e-09	1.26128e-07		BASP1	-0.999475	0.000213646	0.00646534
RPL18A	-0.400045	0.000868146	0.0309494		CSTB	-1.20583	0.000133249	0.0049379		IGFBP6	-1.19912	9.50395e-20	3.84758e-17		PSME2	-1.30071	6.66029e-07	9.43852e-05		BLK	-1.37918	0.000240626	0.00108214		SFN	-0.998446	0.00255615	0.0330755
HLA-A	-0.395789	0.000924006	0.0316385		A1BG	-1.02622	5.72135e-05	0.0028675		UCHL1	-1.16782	1.66342e-09	3.44636e-08		MIF	-1.24314	1.71621e-06	0.000181353		RBP4	-1.35705	2.19775e-05	0.000140452		ISG15	-0.958141	0.0032118	0.0382228
RPL27A	-0.386314	0.00119384	0.0362665		ICAM3	-1.01878	4.31577e-07	0.000123376		HAMP	-1.1502	6.18086e-07	5.51402e-06		FBLN1	-1.13711	0.00680523	0.0439288		ICAM1	-1.29219	3.91766e-10	1.1336e-08		NXN	-0.553818	0.001752	0.0256543
PSME2	-0.385156	0.00190408	0.0459646		SOX17	-1.01759	0.000997984	0.0173815		NGFR	-1.13139	1.27791e-09	2.76276e-08		RPL13	-1.09591	1.46909e-05	0.000816305		VASN	-1.26062	7.95499e-14	6.3231e-12		RPL35	-0.552045	0.000298471	0.00805998
RPS20	-0.367239	0.00049712	0.0235311		SH3BGRL3	-0.990138	0.000125505	0.00473866		ISG15	-1.02356	1.70077e-13	1.12507e-11		NNMT	-1.08555	0.000334033	0.00670303		APOE	-1.19612	1.22535e-06	1.15267e-05		TUBB	-0.344251	0.00135651	0.0218059
SLC3A2	-0.354154	0.000776198	0.0292402		ECM1	-0.972826	0.00349051	0.0380083		CLEC11A	-1.00164	3.87894e-18	1.01971e-15		PSME1	-1.0803	2.32469e-07	4.59697e-05		VEGFC	-1.19313	3.14187e-09	6.90932e-08		SUMO3	-0.341416	0.000441119	0.0105256
CDC37	-0.345985	0.000213222	0.0163427		HSPB1	-0.970785	0.000391214	0.00985422		VASN	-1.00007	9.44688e-17	1.70735e-14		PCOLCE	-1.0188	0.00454705	0.0338731		ECM1	-1.15687	9.03516e-10	2.31938e-08		PSMB7	-0.323642	0.000341715	0.00874469
SQSTM1	-0.330865	0.000315202	0.0195853		RPL13	-0.932484	0.00240739	0.0304474		ITIH2	-0.997466	0.00541544	0.0137889		CLEC11A	-1.00309	0.00785692	0.0481892		VTN	-1.10102	0.000246081	0.00110366		ACTR1A	-0.319192	0.000188827	0.00591129
ACTC1	1.71328	0.000266504	0.017887		RPL35	-0.913467	0.000177769	0.00603119		PTGES	-0.995514	5.00151e-12	2.16326e-10		RPL35	-0.979253	0.000154575	0.00404841		LCK	-1.07366	1.32694e-08	2.34909e-07		PFDN2	-0.296307	0.00252639	0.032945
					SERPINF2	-0.865829	0.00456892	0.0440219		COL6A2	-0.962781	1.56447e-12	7.89724e-11		APOE	-0.977563	0.0008606	0.0117212		CD14	-1.06524	3.32047e-06	2.7906e-05		CTTN	0.270419	0.000309833	0.00822698
					RRP7A	-0.856561	0.00338474	0.0375702		HSPB1	-0.939514	2.45639e-19	8.7232e-17		RRP7A	-0.971483	0.000144065	0.00385599		LAMA1	-1.04201	0.0018246	0.00623381		ACTN4	0.318393	0.00283102	0.0352767
					ACOT7	-0.856533	0.000755114	0.0144831		IGFBP7	-0.918608	2.70215e-15	3.16167e-13		RPL36	-0.928588	0.000464153	0.00819032		MRC2	-1.02431	3.17176e-09	6.96333e-08		CD276	0.40167	0.00287208	0.0356718
					CTSZ	-0.798314	0.00432712	0.0428305		EFEMP2	-0.905075	4.49304e-14	3.51151e-12		C1R	-0.886592	0.00195949	0.0196175		AEBP1	-1.00208	3.59814e-05	0.000213536		LAMB2	0.403227	0.0045401	0.0476111
					RPL36	-0.768926	0.00345267	0.0378851		NXN	-0.899772	5.46461e-11	1.76419e-09		RPL18	-0.81619	0.00175095	0.0182483		PLAUR	-0.976821	6.46387e-10	1.74058e-08		EFEMP2	0.463175	0.00288361	0.0357451
					GM2A	-0.759579	0.000130484	0.00486545		CST3	-0.852222	2.89536e-14	2.41185e-12		RPS9	-0.796792	0.000467977	0.00821815		TIMP2	-0.968881	4.1073e-07	4.55927e-06		RRBP1	0.540879	0.00102028	0.0181033
					G6PD	-0.755327	0.000381997	0.00971203		APOE	-0.846459	2.96669e-06	2.11898e-05		RPS20	-0.771638	0.000931316	0.0123551		COL6A2	-0.920546	7.10238e-06	5.3879e-05		SERPINH1	0.632135	0.00078143	0.0153905
					TKT	-0.75483	0.00360108	0.0385334		MXRA8	-0.843445	9.48262e-11	2.84788e-09		HSPB1	-0.747062	0.00372475	0.0297996		C1R	-0.913716	7.98473e-07	8.01388e-06		PXDN	0.718486	0.00413472	0.0447953
					SQSTM1	-0.743967	0.00403501	0.0408721		FSCN1	-0.824683	3.73448e-07	3.56237e-06		RPL27A	-0.654442	0.00302544	0.0261331		RCN3	-0.912581	7.55227e-06	5.67481e-05		ETV5	0.804719	1.24702e-05	0.000921493
					PFDN2	-0.736703	0.000655526	0.013261		RCN3	-0.817623	4.52741e-13	2.6259e-11		LGALS3BP	-0.652839	0.00499966	0.0359696		PCOLCE	-0.91196	6.17449e-06	4.75378e-05		CSPG4	0.821305	5.44731e-05	0.00259632
					CD63	-0.70872	0.00324738	0.0368064		TUBB6	-0.811569	5.78617e-18	1.46405e-15		RPL18A	-0.627171	0.00250461	0.0230315		ITPKA	-0.905972	2.05354e-05	0.000132866		ITGA3	0.971241	0.000287314	0.00785887
					SH3GL1	-0.674821	9.81799e-05	0.00411285		MIF	-0.803949	4.78744e-13	2.7609e-11		NUDC	-0.620074	0.00355518	0.028996		HLA-B	-0.902948	2.94251e-07	3.44809e-06		COL6A1	1.05378	0.000367414	0.00926554
					ACTR1A	-0.67352	0.000963987	0.0169545		TGFB1	-0.795755	3.25418e-11	1.12018e-09		ICAM3	-0.61689	0.00787947	0.0482269		AXL	-0.894071	5.51679e-05	0.000306709		COL1A1	1.19759	0.000942867	0.0172695
					ATP6AP1	-0.653125	0.00360515	0.0385334		MFGE8	-0.782553	3.1728e-12	1.44648e-10		CD63	-0.560982	0.000153067	0.00402042		BGN	-0.890043	9.90033e-06	7.17756e-05		IGFBP6	1.37546	0.000103966	0.00400426
					ANXA11	-0.63057	0.00352836	0.0381922		SOX17	-0.778074	2.07665e-11	7.53325e-10		RPS11	-0.560795	0.00516118	0.0366556		SERPINF1	-0.888397	3.62738e-05	0.000214949		COL6A2	1.5882	1.8479e-07	3.90249e-05
					ACTB	-0.582268	0.00333614	0.0373191		FLNA	-0.776525	1.61615e-09	3.35681e-08		GNB2	-0.483147	0.0026315	0.0237892		COL6A1	-0.863584	1.31069e-05	9.12134e-05		ITIH2	1.76479	0.000131799	0.00467052
					NUDC	-0.577739	0.000544066	0.0120313		CD248	-0.761479	2.1821e-09	4.4023e-08		GM2A	-0.45558	0.00553444	0.0383239		CXCL13	-0.86071	0.00368902	0.0113551
					PSMB7	-0.548394	0.0050209	0.0466018		FBLN1	-0.761388	8.25713e-07	7.04641e-06		SDF4	-0.444802	0.00610535	0.0409434		TUBB2A	-0.857251	1.06147e-05	7.60904e-05
					GNAI2	-0.489833	0.00547723	0.0488583		PCOLCE	-0.741292	7.6389e-10	1.73738e-08		DBNL	-0.386841	0.000882123	0.0119364		ACAP1	-0.854252	7.00117e-05	0.000376337
					TBCB	-0.479984	0.00503951	0.0466824		KRT7	-0.705218	0.000106898	0.000470267		CD276	0.487827	0.00263255	0.0237892		PTGES	-0.84018	2.62733e-05	0.000163831
					ARHGEF18	-0.472418	0.000572822	0.0123848		CSF2	-0.703908	0.0020438	0.00593809		MAP4	0.539103	0.00106576	0.0134668		S100A10	-0.824439	6.26154e-06	4.80529e-05
					TNIP2	-0.469554	0.000694864	0.0137626		A1BG	-0.694717	5.79188e-08	7.29554e-07		LASP1	0.539128	0.00124312	0.0148241		LTBP2	-0.823326	6.10394e-06	4.70807e-05
					TWF2	-0.468236	0.00325253	0.0368415		HBB	-0.678914	0.000588067	0.00203273		GALNT2	0.595741	0.00205945	0.0202747		HAMP	-0.816415	0.0030277	0.00961557
					CHMP4B	-0.368984	0.00132609	0.0208584		COL6A1	-0.674266	2.72003e-07	2.70825e-06		FASN	0.950057	2.35083e-06	0.000221343		ENO3	-0.775546	1.59114e-06	1.45526e-05
					PTBP1	-0.34633	0.00410052	0.0413496		AXL	-0.672231	1.25461e-08	1.9934e-07		PXDN	1.14175	0.000913517	0.0122076		EMILIN1	-0.773576	0.000643724	0.00254049
					EFEMP2	0.962865	0.00174473	0.0247617		CD14	-0.654947	2.58137e-07	2.58545e-06		KRT16	2.93212	3.16497e-07	5.7286e-05		HLA-C	-0.772728	6.45422e-08	9.2701e-07
					EMILIN1	1.20453	0.00367948	0.0389122		COL1A1	-0.652842	2.26018e-05	0.000123222							COL1A1	-0.765609	0.0011133	0.00408424
					CSF3	2.98171	0.000231607	0.00696108		CEBPB	-0.636549	5.95932e-13	3.34151e-11							FGFR1	-0.757656	3.59469e-05	0.00021346
										S100A9	-0.621524	0.000194108	0.000782854							ACOT7	-0.733334	6.97301e-10	1.85025e-08
										SLC25A6	-0.616047	1.42321e-09	3.01806e-08							GNA12	-0.719291	2.76155e-12	1.44594e-10
										BGN	-0.606364	2.09102e-05	0.000115174							HCK	-0.705758	0.00157709	0.00549539
										FGR	-0.598677	2.43652e-05	0.000131275							CTSZ	-0.669538	9.84718e-08	1.32853e-06
										EHD2	-0.597676	4.6135e-07	4.24768e-06							LOXL2	-0.666523	4.07487e-05	0.00023672
										CSF3	-0.58921	0.00576059	0.0145227							TIMP1	-0.660935	0.000186684	0.000868765
										SERPINH1	-0.581288	9.13356e-14	6.57941e-12							PEA15	-0.659168	8.75789e-12	3.9665e-10
										PLEC	-0.579546	5.40258e-10	1.27756e-08							CLEC11A	-0.658917	0.000268372	0.00119282
										RPL13	-0.577764	1.90601e-11	6.97675e-10							SERPINE1	-0.620142	0.00618613	0.0175939
										AEBP1	-0.57241	0.000179952	0.000734394							ANXA6	-0.597973	0.000997945	0.00370499
										FGFR1	-0.571187	1.51988e-06	1.192e-05							TUBB6	-0.579742	0.00304343	0.00965468
										RAB11B	-0.570608	1.93464e-13	1.24716e-11							MYL12A	-0.578057	8.40369e-13	5.07091e-11
										HLA-A	-0.569753	3.76945e-08	5.03638e-07							VIM	-0.558802	0.00258797	0.00841898
										RBP4	-0.567274	0.00641163	0.0159069							MFGE8	-0.548621	0.000638878	0.00252488
										MYL9	-0.555219	0.000216318	0.000859077							SPARC	-0.547779	0.00170287	0.00587061
										LOXL2	-0.554345	8.57334e-07	7.2886e-06							TPM3	-0.5417	2.63763e-17	5.16258e-15
										PLAU	-0.553503	1.13444e-06	9.29316e-06							SERPINF2	-0.538872	0.00682528	0.0191021
										EMILIN1	-0.543356	1.98066e-05	0.000109843							PSMB7	-0.5352	1.19235e-10	3.95957e-09
										SEMA7A	-0.540028	5.70137e-05	0.000273088							LRFN4	-0.531233	0.00351346	0.0108858
										PRSS22	-0.539246	8.90287e-06	5.45931e-05							ACTN1	-0.514534	0.00035768	0.00152278
										LCK	-0.537248	0.000396507	0.00144536							S100A13	-0.501922	0.00010056	0.000511511
										G6PD	-0.536403	2.44162e-13	1.53488e-11							CD248	-0.483423	0.00512138	0.0149546
										HLA-C	-0.52886	4.20517e-07	3.93715e-06							EHD2	-0.482219	0.00329661	0.0103287
										CSPG4	-0.525315	2.0597e-05	0.000113727							HLA-A	-0.479689	0.0024851	0.00813112
										VIM	-0.515111	2.31515e-06	1.70909e-05							FBLN5	-0.464502	0.0129811	0.0326831
										SERPINE1	-0.512409	0.00100567	0.0032292							PXDN	-0.459849	0.0163817	0.0398411
										AGRN	-0.50745	8.78095e-08	1.04249e-06							LAMB2	-0.457225	0.000268948	0.00119484
										ACOT7	-0.506938	2.54027e-12	1.19028e-10							PLOD1	-0.442449	1.60801e-05	0.000107884
										MRC2	-0.504257	7.64332e-05	0.000352188							PFKP	-0.435637	0.000973639	0.00363042
										CDK20	-0.501716	2.20465e-07	2.26177e-06							PSMB4	-0.404646	1.49774e-06	1.37876e-05
										NNMT	-0.499148	0.00028783	0.00110075							B4GALT1	-0.404186	4.41214e-05	0.000253801
										TIMP1	-0.488731	1.65225e-07	1.78754e-06							EFEMP2	-0.402904	0.0202984	0.0477132
										RPS16	-0.488039	6.5663e-10	1.52077e-08							HDGF	-0.396949	6.59498e-09	1.29235e-07
										VAT1	-0.48239	1.27185e-08	2.01132e-07							MMP14	-0.388307	0.00299286	0.0095202
										ITPKA	-0.481555	0.000135787	0.000576381							SUMO3	-0.385271	9.74894e-09	1.79992e-07
										HCK	-0.474048	0.000466731	0.00165922							PLOD3	-0.384069	2.40618e-05	0.000151763
										CCL4	-0.470563	0.0028167	0.00785664							DBN1	-0.383758	0.0137997	0.0344462
										TTYH3	-0.46659	3.38806e-08	4.60585e-07							CTSB	-0.381888	0.00772365	0.0211726
										GNB2	-0.462038	2.33317e-11	8.29291e-10							TUBA1B	-0.370017	3.56239e-07	4.05212e-06
										C1R	-0.459587	0.000150413	0.000629452							ACTB	-0.36617	7.30113e-06	5.51542e-05
										SLC25A5	-0.458613	5.41574e-08	6.89035e-07							LASP1	-0.348907	7.23301e-06	5.47158e-05
										SPARC	-0.454441	0.000206559	0.000824851							CEBPB	-0.347	0.00300828	0.0095585
										TBCB	-0.453346	6.01518e-13	3.36352e-11							LMNA	-0.344426	0.000212511	0.000972322
										RPL10	-0.442138	5.68571e-10	1.33515e-08							CDK20	-0.34151	0.0091291	0.0243377
										ACTB	-0.440152	1.93137e-10	5.25468e-09							RRBP1	-0.332552	4.9097e-05	0.00027724
										GRN	-0.43228	3.55321e-07	3.41034e-06							TUBB	-0.33173	2.92715e-05	0.000179585
										SFN	-0.428471	3.37455e-05	0.000173326							SERPINH1	-0.329306	0.00356533	0.0110241
										CD276	-0.426227	2.63935e-08	3.71011e-07							ICAM3	-0.299825	0.0143897	0.0356938
										GNAI2	-0.424548	3.60678e-09	6.89083e-08							FDPS	-0.292561	0.000696341	0.0027178
										ITGA3	-0.420941	1.22776e-05	7.21821e-05							SLC25A5	-0.267929	0.00134353	0.00479638
										ICAM3	-0.419969	2.36589e-06	1.74274e-05							PSMB2	-0.262984	1.39665e-05	9.60808e-05
										RPL35	-0.41742	1.53822e-07	1.68125e-06							PFN1	-0.261969	0.00176431	0.00605922
										EIF6	-0.415204	2.75774e-07	2.73906e-06							MAP4	-0.254261	0.00103712	0.00382888
										PLOD3	-0.413186	3.35613e-07	3.25203e-06							CLIC1	-0.248966	0.000783881	0.00301429
										CD151	-0.409393	1.30775e-08	2.05844e-07							NUDC	-0.23457	0.00263133	0.00853059
										MAPK11	-0.407264	0.000700082	0.00236342							VAT1	-0.226378	0.00895467	0.023976
										SERPINF1	-0.40368	0.000816011	0.00269633							GNAI2	-0.205863	0.0036434	0.0112321
										TIMP2	-0.399692	0.00146248	0.00445634							CHMP4B	-0.194313	0.0107672	0.0279407
										PSMA7	-0.399581	2.51461e-06	1.83426e-05							PSMA7	-0.181392	0.0125404	0.031727
										MMP14	-0.389541	0.000205238	0.00082136							GNB1	-0.134132	0.00824736	0.0223605
										HLA-B	-0.380436	0.00025212	0.000980672							DCTN2	0.161411	0.00132479	0.00473802
										AP2A1	-0.378918	7.05675e-09	1.22402e-07							RPL10	0.198967	0.00968061	0.0255732
										FBLN5	-0.373765	0.0024317	0.00691327							TNFRSF1A	0.212804	0.0146749	0.036283
										RPL18	-0.368069	2.58958e-07	2.59073e-06							CD63	0.238239	0.0150843	0.037156
										PFKP	-0.366405	1.14193e-05	6.78453e-05							ANXA11	0.259826	0.0082985	0.0224684
										GAPDH	-0.361504	4.68599e-06	3.13511e-05							CD9	0.273567	0.015327	0.0376554
										LAMB3	-0.354536	0.000211513	0.000842141							RPL23	0.274506	0.00423811	0.0127575
										SLC1A5	-0.353785	3.87418e-06	2.66286e-05							ALDOA	0.280126	0.00514463	0.015007
										PLAUR	-0.352264	0.000334981	0.00125197							AGRN	0.292041	0.00547734	0.0158352
										VEGFC	-0.35115	0.00474956	0.0122958							GPI	0.309457	0.002599	0.00844655
										S100A13	-0.346496	0.000395943	0.00144383							GAPDH	0.309948	0.0025427	0.00829627
										CHMP1A	-0.346191	1.47389e-08	2.26878e-07							RPL36	0.311147	0.012666	0.0319793
										LAMB2	-0.341673	0.000433936	0.00156044							RPL27A	0.320484	0.00147811	0.00521198
										DBN1	-0.340977	0.00380065	0.0101494							RPL18A	0.329759	0.00179296	0.00613632
										PFN1	-0.337563	4.41986e-06	2.98521e-05							RPS9	0.332038	0.000658278	0.00258538
										SH3GL1	-0.337419	3.88082e-09	7.33479e-08							CST3	0.341359	0.00577451	0.016566
										DBNL	-0.336042	1.57316e-08	2.39969e-07							VASP	0.348917	5.7313e-05	0.000316854
										OAS3	-0.330963	0.00131445	0.00407958							RPS20	0.374274	6.87633e-05	0.000370599
										RPL36	-0.318384	4.88757e-05	0.000238914							CSTB	0.381352	0.00501495	0.0146828
										FGFR4	-0.316187	0.0055309	0.0140441							RPL18	0.41834	6.24844e-05	0.000340874
										CTSZ	-0.314671	7.34588e-06	4.62937e-05							FASN	0.419015	0.00106807	0.00393216
										HSPG2	-0.302412	0.00461952	0.0120114							RPS11	0.438669	3.31492e-06	2.78713e-05
										ATP6AP1	-0.293158	1.0107e-07	1.18326e-06							SQSTM1	0.441232	3.76518e-05	0.000221721
										MDH2	-0.292747	4.04558e-08	5.34535e-07							TKT	0.455235	0.000145516	0.00070006
										LMNA	-0.289232	5.49267e-06	3.58746e-05							PLXNB2	0.460618	1.11396e-07	1.47672e-06
										ALDOA	-0.283129	2.96891e-05	0.00015565							GM2A	0.478139	0.000125259	0.000616392
										ICAM1	-0.279518	0.0119385	0.0269979							HSPA1A	0.494671	0.000592768	0.00236772
										PLXNB2	-0.277476	0.000424042	0.0015297							RPL13	0.515506	6.28006e-06	4.81763e-05
										PXDN	-0.276376	0.0215476	0.0445135							MIF	0.656316	1.11035e-08	2.018e-07
										PLOD1	-0.273143	1.02941e-05	6.1979e-05							PGD	0.723485	9.58858e-07	9.33943e-06
										GNA12	-0.270107	1.23758e-08	1.97408e-07							HSPB1	0.72807	1.5755e-06	1.44229e-05
										UBA1	-0.269596	6.08985e-06	3.93334e-05							G6PD	0.829039	4.51646e-06	3.61755e-05
										TWF2	-0.269015	5.03495e-06	3.33609e-05							CTTN	0.84269	1.03837e-13	8.02581e-12
										SDF4	-0.26514	2.50435e-06	1.82876e-05
										GEM	-0.263082	0.0202166	0.0422011
										SLC3A2	-0.262391	8.62494e-06	5.31303e-05
										FASN	-0.262135	0.00536569	0.0136912
										LRFN4	-0.253735	0.00213597	0.00616781
										SUMO3	-0.253628	3.71984e-06	2.57074e-05
										TNIP2	-0.246899	5.39815e-06	3.53737e-05
										RPS9	-0.241853	0.000413982	0.00150069
										PSMB4	-0.233821	2.09706e-06	1.56811e-05
										ACTG1	-0.233584	0.000122512	0.000529212
										PSAP	-0.232612	2.64063e-05	0.000140477
										PSMB7	-0.225309	1.66195e-06	1.28696e-05
										TUBA1B	-0.222029	0.000490867	0.00173546
										TNFRSF1A	-0.221675	5.12013e-05	0.000248482
										RAB5C	-0.218301	0.000101924	0.00045165
										SH3BGRL3	-0.217943	0.00570761	0.0144182
										PGD	-0.216067	0.000850474	0.00279651
										CTSB	-0.215933	0.00596828	0.0149573
										ACTN1	-0.204988	0.000905828	0.00295214
										GPI	-0.202228	0.000342024	0.00127477
										CDC37	-0.19086	0.000108974	0.000478388
										CSTB	-0.187848	0.0121793	0.0274627
										PSME1	-0.166585	0.0195848	0.0410983
										RPS11	-0.153965	0.0197295	0.0413464
										TKT	-0.148532	0.0192812	0.040558
										ANXA11	-0.142969	0.00176134	0.00522465
										ACTR1A	-0.136375	0.000210881	0.000840122
										GNB1	-0.130821	0.00145445	0.0044379
										ARPC1A	-0.128765	0.00821432	0.0196368
										DCTN2	-0.121121	0.00184048	0.00542129
										PSMC5	-0.120242	0.00835997	0.019932
										PSMB2	-0.119048	0.0101563	0.0235707
										CTTN	-0.112686	0.0223453	0.0459249
										SRRT	-0.109544	0.0157	0.0340184
										COG1	0.108472	0.0221842	0.0456586
										OS9	0.143114	0.0019809	0.00577356
										HDGF	0.149893	0.00406143	0.0107466
