# Supplementary material for: Suppression of p16 alleviates the senescence-associated secretory phenotype
Source: Aging (Albany NY). 2021 Feb 6;13(3):3290–312. doi: 10.18632/aging.202640 (PMC7906185; doi:10.18632/aging.202640)
Supplement: Supplementary Table 3 [file aging-13-202640-s004.xls]

## Sheet: Sheet1
	Supplementary Table 3. Gene Set Enrichment Analysis for CDKN2A-low (p16-low) vs. CDKN2A-high (p16-high) tumors using Casella et al. senescence expression signature.
	Tumor type	NAME	p16-low vs.p16-high
			ES	NES	NOM p-val	FDR q-val	FWER p-val	RANK AT MAX	LEADING EDGE
	PAAD	CASELLA ET AL. SENESCENCE UPREGULATED GENES	0.579648	1.48543	0.0189633	0.0189633	0.015	1356	tags=21%, list=7%, signal=22%
	MESO	CASELLA ET AL. SENESCENCE UPREGULATED GENES	-0.448369	-1.28763	0.130501	0.130501	0.086	2174	tags=23%, list=12%, signal=26%
	COADREAD	CASELLA ET AL. SENESCENCE UPREGULATED GENES	0.326876	1.04272	0.346491	0.346491	0.079	2421	tags=21%, list=12%, signal=23%
	BLCA	CASELLA ET AL. SENESCENCE UPREGULATED GENES	-0.396106	-1.02585	0.414754	0.414754	0.253	3084	tags=31%, list=16%, signal=36%
	SKCM	CASELLA ET AL. SENESCENCE UPREGULATED GENES	0.31864	1.01009	0.417004	0.417004	0.103	2210	tags=15%, list=12%, signal=18%
	GBM	CASELLA ET AL. SENESCENCE UPREGULATED GENES	-0.307233	-0.799288	0.761494	0.761494	0.53	492	tags=8%, list=3%, signal=8%
