# Supplementary material for: Suppression of p16 alleviates the senescence-associated secretory phenotype
Source: Aging (Albany NY). 2021 Feb 6;13(3):3290–312. doi: 10.18632/aging.202640 (PMC7906185; doi:10.18632/aging.202640)
Supplement: Supplementary Table 4 [file aging-13-202640-s005.xls]

## Sheet: Sheet1
Supplementary Table 4. Primer Sequences.
Primer Name	Sequence 5' --> 3'
PUM1 Fw	CGGTCGTCCTGAGGATAAAA
PUM1 Rv	CGTACGTGAGGCGTGAGTAA
PMSC4 Fw	TGTTGGCAAAGGCGGTGGCA
PMSC4 Rv	TCTCTTGGTGGCGATGGCAT
MRPL19 Fw	CAGTTTCTGGGGATTTGCAT
MRPL19 Rv	TATTCAGGAAGGGCATCTCG
IL6 Fw	GCCCAGCTATGAACTCCTTCT
IL6 Rv	GAAGGCAGCAGGCAACAC
CXCL8 Fw	AGACAGCAGAGCACACAAGC
CXCL8 Rv	ATGGTTCCTTCCGGTGGT
LMNB1 Fw	TGGAGTGGTTGTTGAGGAAG
LMNB1 Rv	GAGAAGGCTCTGCACTGTATAC
EREG Fw	CTTATCACAGTCGTCGGTTCCAC
EREG Rv	GCCATTCAGACTTGCGGCAACT
AREG Fw	GGAGAAGCTGAGGAACGAAAG
AREG Rv	CACTGGAAAGAGGACCGAC
PLAU Fw	GGCTTAACTCCAACACGCAAGG
PLAU Rv	CCTCCTTGGAACGGATCTTCAG
VEGFA Fw	AGGGCAGAATCATCACGAAG
VEGFA Rv	GGATGGCTTGAAGATGTACTCG
PLAT Fw	TGGTGCTACGTCTTTAAGGCGG
PLAT Rv	GCTGACCCATTCCCAAAGTAGC
ICAM1 Fw	AGCGGCTGACGTGTGCAGTAAT
ICAM1 Rv	CTGAGACCTCTGGCTTCGTCA
CSF3 Fw	CATAGCGGCCTTTTCCTCTAC
CSF3 Rv	CCATTCCCAGTTCTTCCATCT
MMP3 Fw	AATAGCTGAAGACTTTCCAGGG
MMP3 Rv	AGCCAGCTGTTACTCTTCAAAG
